# Supplementary material for: Excited state properties of non-doped thermally activated delayed fluorescence emitters with aggregation-induced emission: a QM/MM study
Source: Royal Society of Chemistry journal article supplement (doi:10.1039/c7tc02541f), 2017-01-01
Supplement: c7tc02541f1.pdf [file c7tc02541f1.pdf]

*Supporting Information for*

Excited State Property of Non-doped Thermally Activated  
Delayed Fluorescence Emitters with Aggregation-Induced

Emission: A QM/MM study

Jianzhong Fan, Lili Lin\*, Chuan-Kui Wang\*

Shandong Province Key Laboratory of Medical Physics and Image Processing Technology, Institute of  
Materials and Clean Energy, School of Physics and Electronics, Shandong Normal University, 250014

Jinan, China

\*Author to whom correspondence should be addressed.

E-mail: [ckwang@sdu.edu.cn](mailto:ckwang@sdu.edu.cn) and [linll@sdu.edu.cn](mailto:linll@sdu.edu.cn).

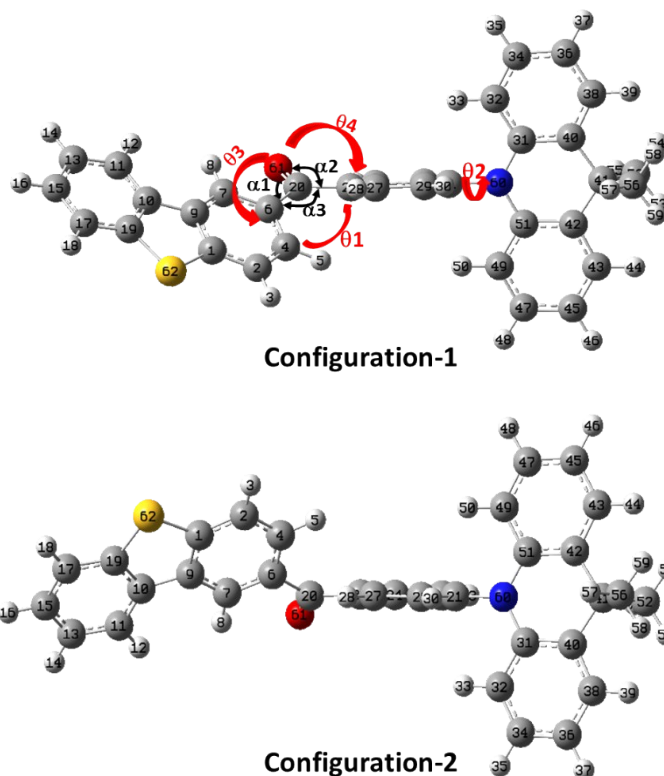

Figure S1. Two ground state configurations of DBT-BZ-DMAC.

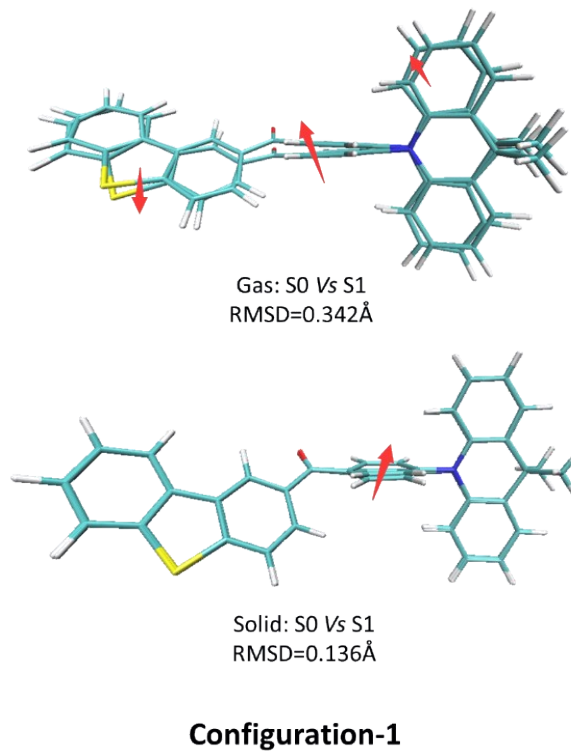

Figure S2. Geometry changes between S0 and S1 in gas and solid phase for configuration-1.

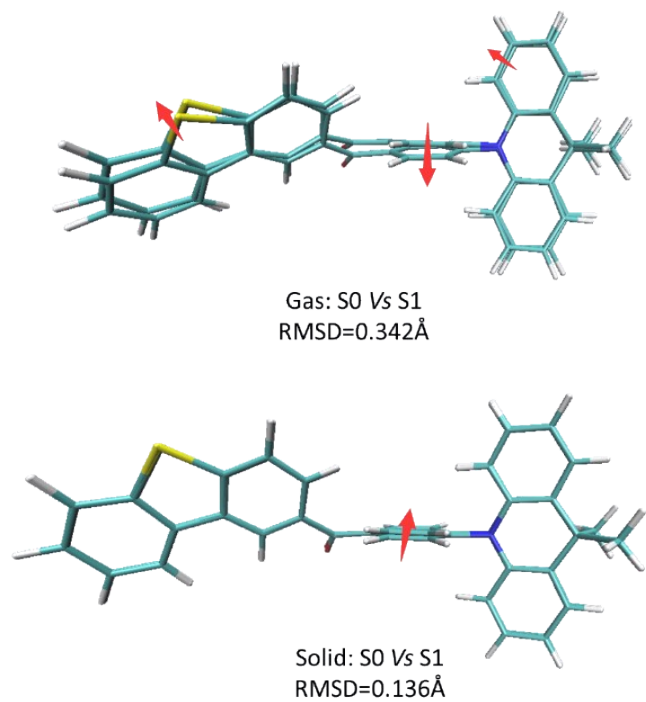

### Configuration-2

Figure S3. Geometry changes between S0 and S1 in gas and solid phase for configuration-2.

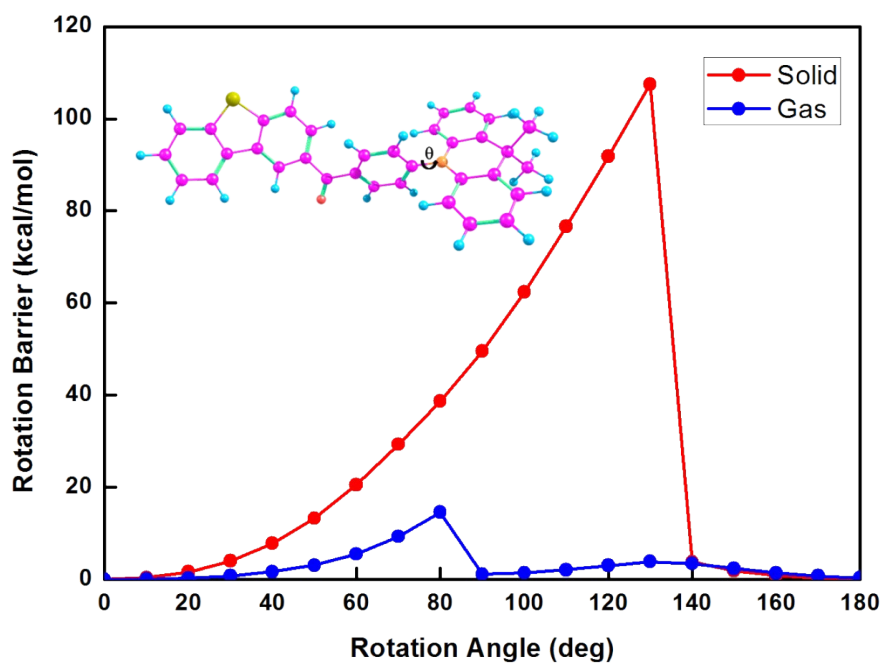

Figure S4. Rotational energy barriers (kcal/mol) obtained by rotating the dihedral angle  $\theta$  marked in inset in gas (blue line) and solid phase (red line) respectively.

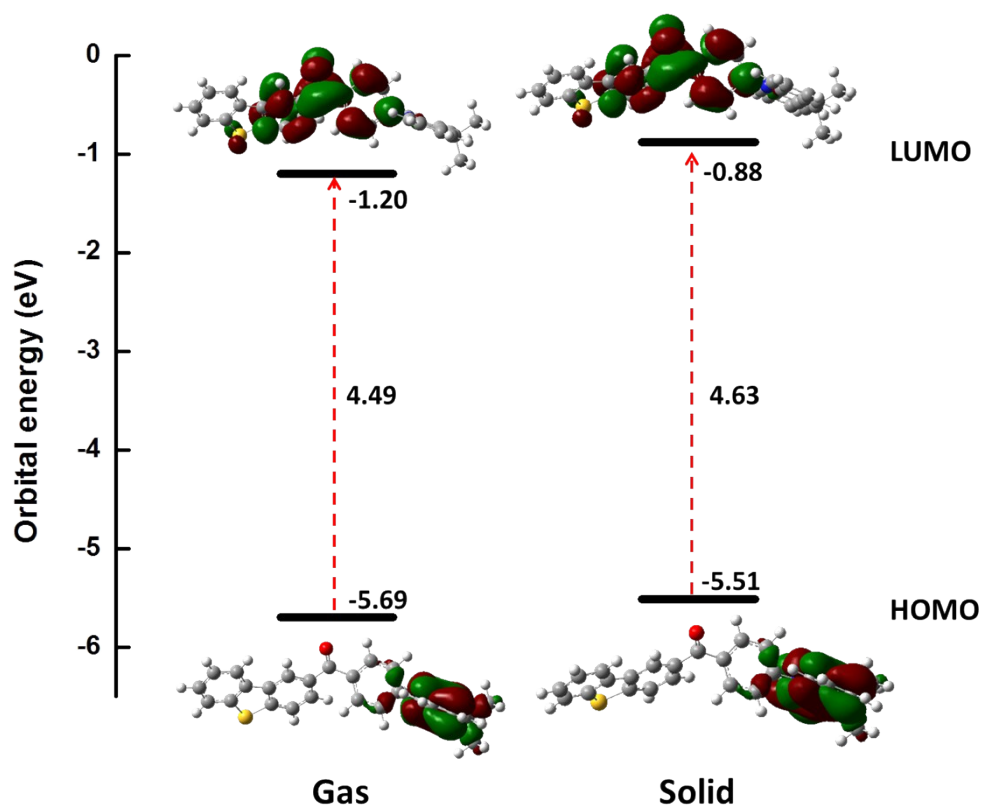

Figure S5. Frontier orbital distributions and their energy gaps of DBT-BZ-DMAC in gas and solid phase respectively.

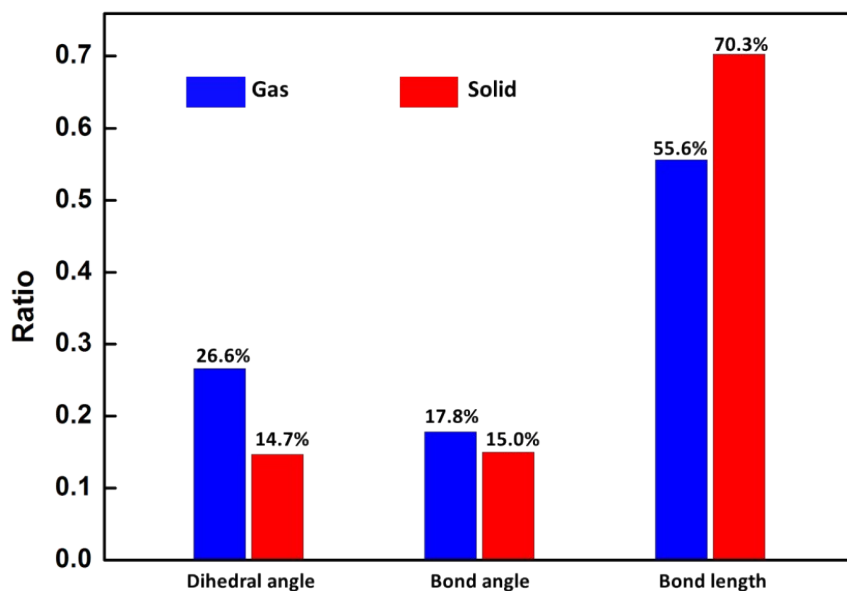

Figure S6. Contribution ratios to the reorganization energy from bond length, bond angle and dihedral angle of DBT-BZ-DMAC in gas and solid phase respectively.

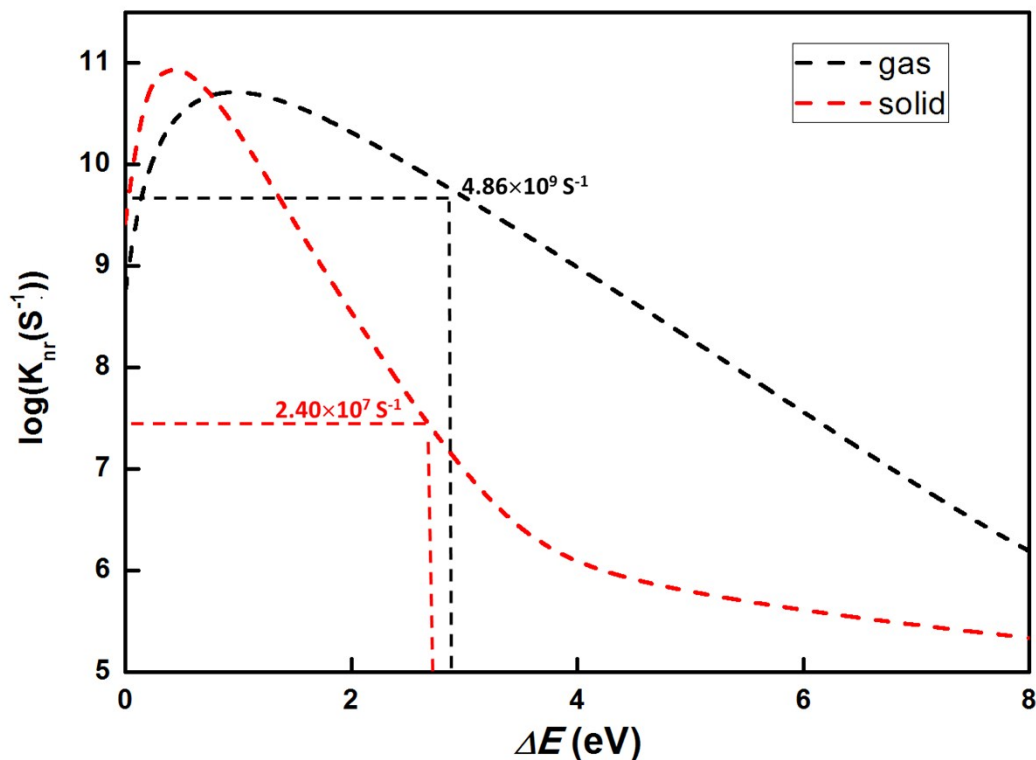

Figure S7. Non-radiative decay rate  $k_{nr}$  from S1 to S0 versus the adiabatic energy gap  $\Delta E$  in gas (black) and solid phase (red) respectively.

Table S1. Geometry parameters of configuration-1 in gas and solid phase.  $\theta$ ,  $\alpha$  and B represents the dihedral angle, bond angle and bond length respectively.

|            | Configuration-1 |       |       |       |       |        | Exp   |
|------------|-----------------|-------|-------|-------|-------|--------|-------|
|            | Gas             |       |       | Solid |       |        |       |
|            | S0              | S1    | T1    | S0    | S1    | T1     | S0    |
| $\theta_1$ | 49.9            | 43.7  | 48.3  | 63.1  | 53.3  | 48.7   | 60.8  |
| $\theta_2$ | -86.3           | -90.5 | -96.3 | -91.3 | -99.5 | -112.1 | -93.9 |
| $\theta_3$ | 152.3           | 145.2 | 148.4 | 148.2 | 142.8 | 143.8  | 145.5 |
| $\theta_4$ | 149.5           | 165.8 | 157.5 | 138.2 | 154.7 | 159.6  | 143.8 |
| $\alpha_1$ | 120.1           | 117.7 | 114.4 | 120.4 | 118.6 | 118.4  | 120.0 |
| $\alpha_2$ | 119.6           | 121.4 | 117.5 | 119.6 | 121.2 | 120.7  | 119.7 |
| $\alpha_3$ | 120.3           | 120.9 | 128.1 | 120.0 | 120.2 | 120.9  | 120.2 |
| B1         | 1.507           | 1.513 | 1.465 | 1.502 | 1.507 | 1.506  | 1.488 |
| B2         | 1.511           | 1.456 | 1.456 | 1.505 | 1.454 | 1.452  | 1.492 |
| B3         | 1.430           | 1.439 | 1.429 | 1.429 | 1.446 | 1.430  | 1.439 |

$\theta_1$ : (2,4,6)&(26,27,29).  $\theta_2$ : 22-21-60-51.  $\theta_3$ : 4-6-20-61.  $\theta_4$ : 27-26-20-61.

$\alpha_1$ : 6-20-61.  $\alpha_2$ : 26-20-61.  $\alpha_3$ : 6-20-26.

B1: 6-20. B2:20-26. B3:21-60.

Table S2. Geometry parameters of configuration-2 in gas and solid phase.  $\theta$ ,  $\alpha$  and B represents the dihedral angle, bond angle and bond length respectively.

|                             | Configuration-2 |        |        |        |        |        | Exp    |
|-----------------------------|-----------------|--------|--------|--------|--------|--------|--------|
|                             | Gas             |        |        | Solid  |        |        |        |
|                             | S0              | S1     | T1     | S0     | S1     | T1     | S0     |
| <b><math>\theta</math>1</b> | 49.9            | 43.8   | 48.3   | 63.1   | 53.3   | 48.7   | 60.8   |
| <b><math>\theta</math>2</b> | 86.3            | 90.5   | 96.3   | 91.3   | 99.5   | 112.1  | 93.9   |
| <b><math>\theta</math>3</b> | -152.4          | -145.2 | -148.4 | -148.2 | -142.8 | -143.8 | -145.5 |
| <b><math>\theta</math>4</b> | -149.5          | -165.8 | -157.5 | -138.2 | -154.7 | -159.6 | -143.8 |
| <b><math>\alpha</math>1</b> | 120.1           | 117.7  | 114.4  | 120.4  | 118.6  | 118.4  | 120.0  |
| <b><math>\alpha</math>2</b> | 119.6           | 121.4  | 117.5  | 119.6  | 121.2  | 120.7  | 119.7  |
| <b><math>\alpha</math>3</b> | 120.3           | 120.9  | 128.1  | 120.0  | 120.2  | 120.9  | 120.2  |
| <b>B1</b>                   | 1.507           | 1.513  | 1.465  | 1.502  | 1.507  | 1.506  | 1.488  |
| <b>B2</b>                   | 1.511           | 1.456  | 1.456  | 1.505  | 1.454  | 1.452  | 1.492  |
| <b>B3</b>                   | 1.430           | 1.439  | 1.429  | 1.429  | 1.446  | 1.430  | 1.439  |

$\theta$ 1: (2,4,6)&(26,27,29).  $\theta$ 2: 22-21-60-51.  $\theta$ 3: 4-6-20-61.  $\theta$ 4: 27-26-20-61.

$\alpha$ 1: 6-20-61.  $\alpha$ 2: 26-20-61.  $\alpha$ 3: 6-20-26.

B1: 6-20. B2:20-26. B3:21-60.
